# Supplementary material for: Overexpression of SOD gene derived from Milk thistle increases drought tolerance in Tobacco through enhancement of photosynthetic functionality and photo-protective mechanism
Source: Research Square preprint supplement (doi:10.21203/rs.3.rs-6755854/v1), 2025-06-13
Supplement: Supplementary file 1 [file 31e8e4a433aa86739b827b7e.docx]

| 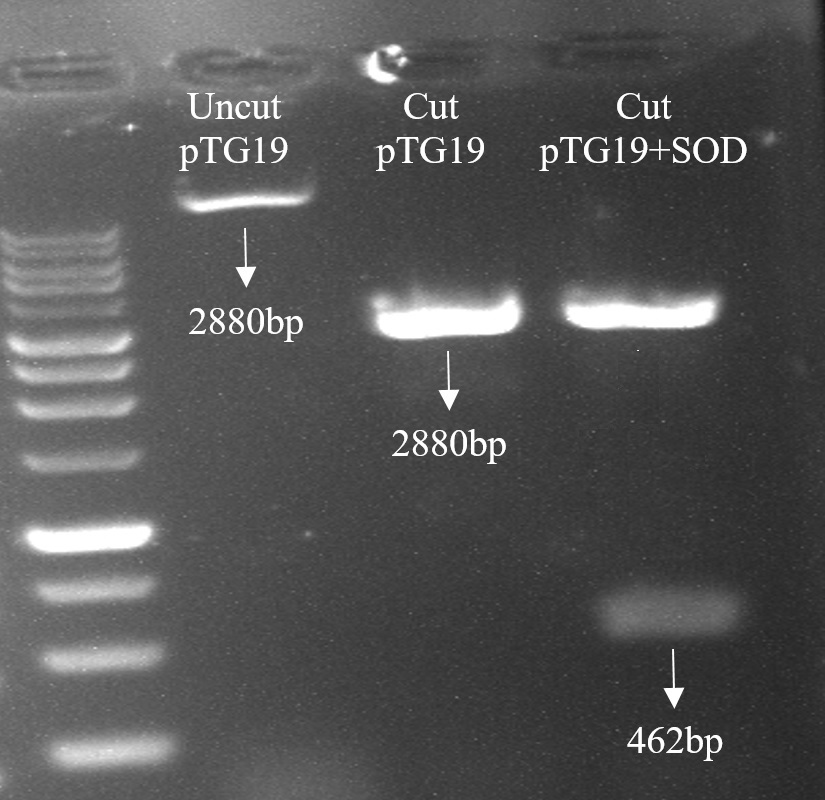 | 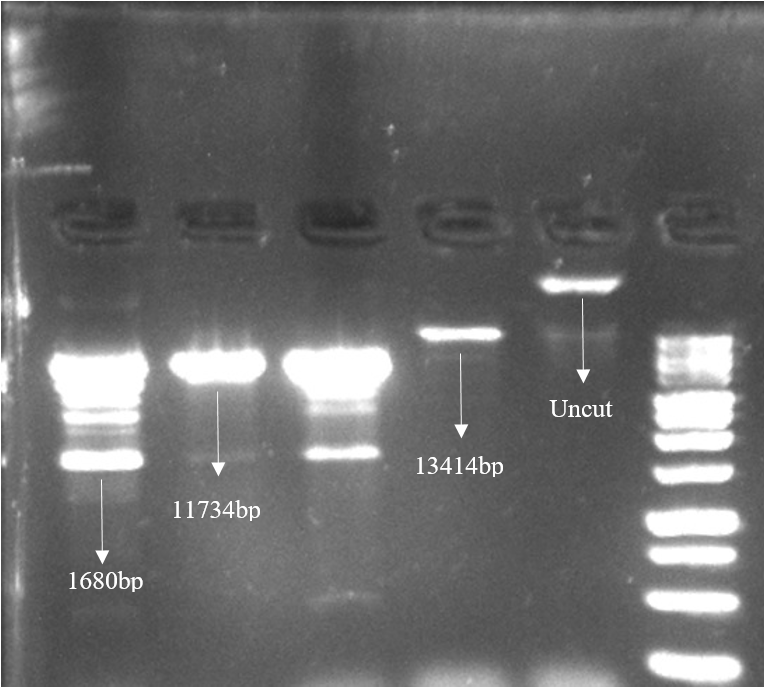 |
| --- | --- |
| (a) | (b) |
| 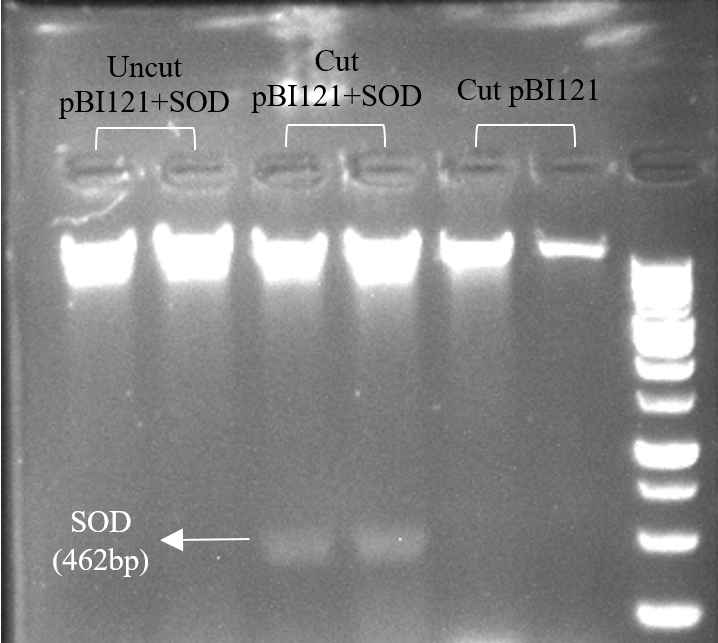 | 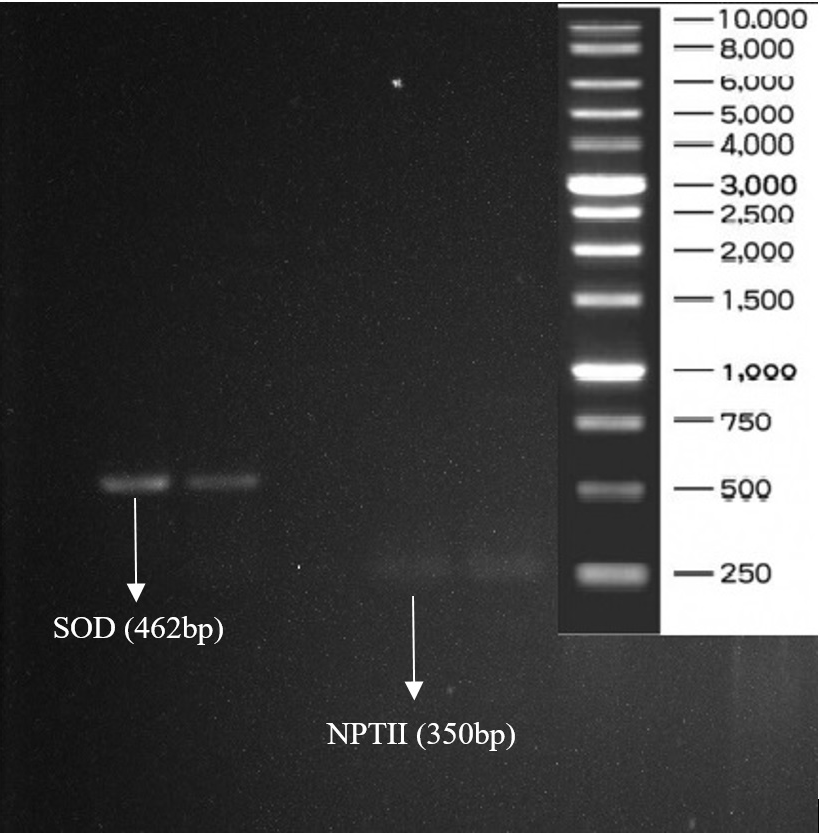 |
| (c) | (d) |
| Sup2. Confirmation of vectors digestion pTG19 and pBI121 and PCR results on gel electrophoresis. (a) Digestion of pTG19+SOD vector with BamHI enzyme. (b) Digestion of pBI121+SOD vector with HindIII and EcoRI enzymes. (c) Digestion of pBI121+SOD vector with BamHI enzyme. (d) Confirmation of PCR results of transgenic plants with primers SOD and NPTII. | |
