# Supplementary material for: Overexpression of SOD gene derived from Milk thistle increases drought tolerance in Tobacco through enhancement of photosynthetic functionality and photo-protective mechanism
Source: Research Square preprint supplement (doi:10.21203/rs.3.rs-6755854/v1), 2025-06-13
Supplement: Supplementary file 2 [file 80d28740e41e14f1c2197175.docx]

| **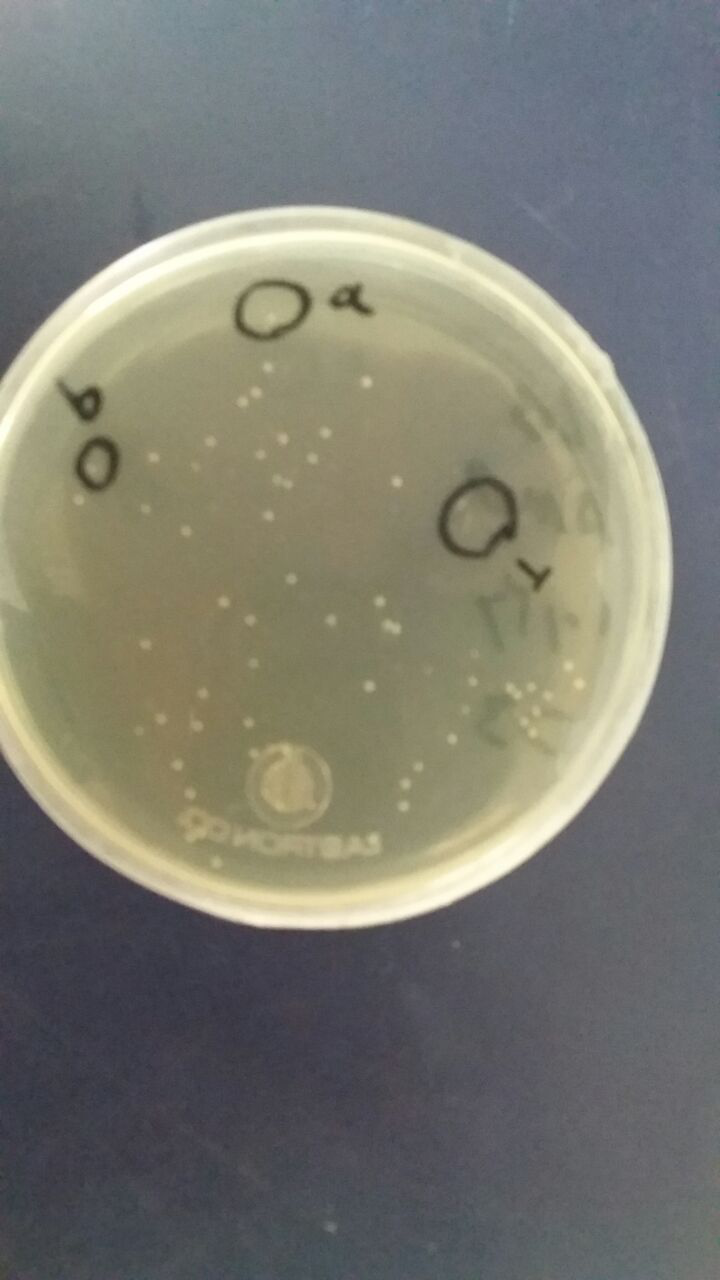** | **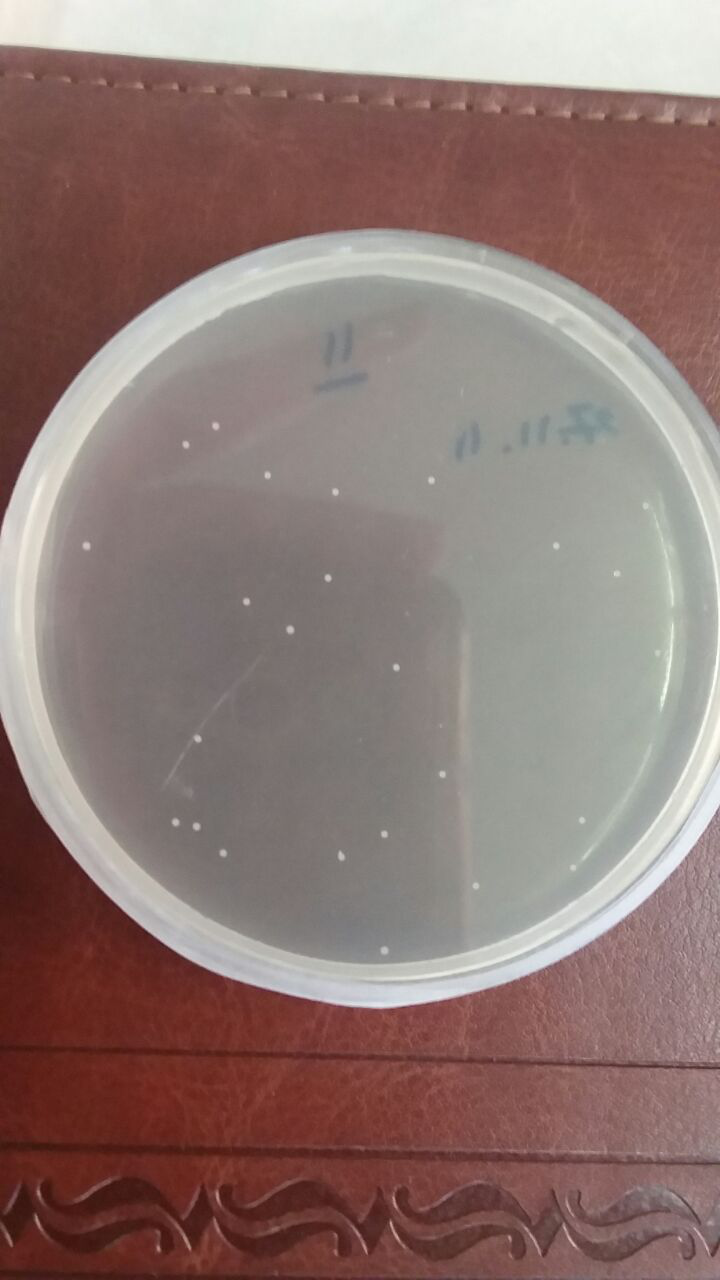** |
| --- | --- |
| (a) | (b) |
| Sup1. Cloning confirmation of the SOD gene into the vectors pTG19 and pBI121 transformed in E. coli DH5α bacteria through the growth of bacterial colonies containing the desired vector. (a) Bacterial colonies containing vector pTG19+SOD. (b) Bacterial colonies containing vector pBI121+SOD. | |
